# Supplementary material for: A new 12L-hexagonal perovskite Cs4Mg3CaF12: structural transition derived from the partial substitution of Mg2+with Ca2+
Source: Royal Society of Chemistry journal article supplement (doi:10.1039/c4ra07819e), 2014-01-01
Supplement: c4ra07819e1.pdf [file c4ra07819e1.pdf]

# **A New 12L-Hexagonal Perovskite $\text{Cs}_4\text{Mg}_3\text{CaF}_{12}$ : Structural Transition Derived from the Partial Substitution of $\text{Mg}^{2+}$ with $\text{Ca}^{2+}$**

Zheng Wang,<sup>ab</sup> Qun Jing,<sup>ab</sup> Min Zhang,<sup>\*a</sup> Xiaoyu Dong,<sup>ab</sup> Shilie Pan,<sup>\*a</sup> Zhihua Yang<sup>a</sup>

*<sup>a</sup>Key Laboratory of Functional Materials and Devices for Special Environments of CAS; Xinjiang  
Key Laboratory of Electronic Information Materials and Devices; Xinjiang Technical Institute of  
Physics & Chemistry of CAS, 40-1 South Beijing Road, Urumqi 830011, China*

*<sup>b</sup>University of Chinese Academy of Sciences, Beijing 100049, China*

\* To whom correspondence should be addressed. E-mail: [zhangmin@ms.xjb.ac.cn](mailto:zhangmin@ms.xjb.ac.cn) (M. Zhang); E-mail: [slpan@ms.xjb.ac.cn](mailto:slpan@ms.xjb.ac.cn) (S. Pan)

**Table S1** Atomic coordinates, equivalent isotropic displacement parameters ( $\text{\AA}^2$ ) and bond valence sum (BVS) for CMCF.  $U(eq)$  is defined as one third of the trace of the orthogonalized  $U_{ij}$  tensor.

| Atoms | Site | S.O.F | $x$     | $y$     | $z$     | $U(eq)$ | BVS  |
|-------|------|-------|---------|---------|---------|---------|------|
| Cs(1) | 4e   | 1     | 0       | 0       | 1315(1) | 16(1)   | 1.14 |
| Cs(2) | 4e   | 1     | 6667    | 3333    | 503(1)  | 14(1)   | 1.31 |
| Mg(1) | 2b   | 1     | 3333    | 6667    | 1667    | 11(1)   | 2.46 |
| Mg(2) | 2b   | 1     | 3333    | 6667    | 751(1)  | 10(1)   | 2.20 |
| Ca(1) | 4e   | 1     | 0       | 0       | 0       | 11(1)   | 1.94 |
| F(1)  | 4e   | 1     | 1752(2) | 3505(3) | 416(1)  | 17(1)   | 1.10 |
| F(2)  | 4e   | 1     | 570(3)  | 5285(2) | 1231(1) | 15(1)   | 1.18 |

**Table S2** Selected bond lengths (Å) for CMCF<sup>a</sup>.

|               |            |               |            |
|---------------|------------|---------------|------------|
| Mg(1)-F(2)    | 1.9747(16) | Cs(1)-F(2)#3  | 3.1349(5)  |
| Mg(1)-F(2)#15 | 1.9747(16) | Cs(1)-F(2)#4  | 3.1349(5)  |
| Mg(1)-F(2)#3  | 1.9747(16) | Cs(1)-F(2)#5  | 3.1349(5)  |
| Mg(1)-F(2)#16 | 1.9747(16) | Cs(1)-F(2)#6  | 3.1503(17) |
| Mg(1)-F(2)#7  | 1.9747(16) | Cs(1)-F(2)#7  | 3.1503(17) |
| Mg(1)-F(2)#17 | 1.9748(16) | Cs(1)-F(2)#8  | 3.1503(17) |
| Mean          | 1.9747     | Cs(1)-F(1)#1  | 3.2783(18) |
| Mg(2)-F(1)#15 | 1.9737(18) | Cs(1)-F(1)#2  | 3.2783(18) |
| Mg(2)-F(1)    | 1.9737(18) | Cs(1)-F(1)    | 3.2783(18) |
| Mg(2)-F(1)#3  | 1.9737(18) | Mean          | 3.1742     |
| Mg(2)-F(2)#15 | 2.066(2)   | Cs(2)-F(2)#9  | 3.0229(16) |
| Mg(2)-F(2)    | 2.066(2)   | Cs(2)-F(2)#2  | 3.0229(16) |
| Mg(2)-F(2)#3  | 2.066(2)   | Cs(2)-F(2)#3  | 3.0229(16) |
| Mean          | 2.0199     | Cs(2)-F(1)#10 | 3.1219(5)  |
| Ca(1)-F(1)#22 | 2.2589(16) | Cs(2)-F(1)#9  | 3.1219(5)  |
| Ca(1)-F(1)    | 2.2589(16) | Cs(2)-F(1)#2  | 3.1219(5)  |
| Ca(1)-F(1)#23 | 2.2589(16) | Cs(2)-F(1)#11 | 3.1219(5)  |
| Ca(1)-F(1)#2  | 2.2589(16) | Cs(2)-F(1)    | 3.1219(5)  |
| Ca(1)-F(1)#13 | 2.2589(16) | Cs(2)-F(1)#3  | 3.1219(5)  |
| Ca(1)-F(1)#1  | 2.2589(16) | Cs(2)-F(1)#12 | 3.2256(18) |
| Mean          | 2.2589     | Cs(2)-F(1)#13 | 3.2256(18) |
| Cs(1)-F(2)#1  | 3.1349(5)  | Cs(2)-F(1)#14 | 3.2256(18) |
| Cs(1)-F(2)    | 3.1349(5)  | Mean          | 3.1230     |
| Cs(1)-F(2)#2  | 3.1349(5)  |               |            |

<sup>a</sup> Note. Symmetry transformations used to generate equivalent atoms:

- #1 -y,x-y,z    #2 -x+y,-x,z    #3 -y+1,x-y+1,z  
 #4 -x+y-1,-x,z    #5 x,y-1,z    #6 y-1/3,-x+y-2/3,-z+1/3  
 #7 x-y+2/3,x+1/3,-z+1/3    #8 -x-1/3,-y+1/3,-z+1/3  
 #9 x+1,y,z    #10 -y+1,x-y,z    #11 -x+y+1,-x+1,z  
 #12 x-y+1,x,-z    #13 y,-x+y,-z    #14 -x+1,-y+1,-z  
 #15 -x+y,-x+1,z    #16 -x+2/3,-y+4/3,-z+1/3  
 #17 y-1/3,-x+y+1/3,-z+1/3    #18 -x+2/3,-y+1/3,-z+1/3  
 #19 x,y+1,z    #20 x+1,y+1,z    #21 x-1,y,z  
 #22 -x,-y,-z    #23 x-y,x,-z    #24 -x+1,-y,-z  
 #25 x-1,y-1,z

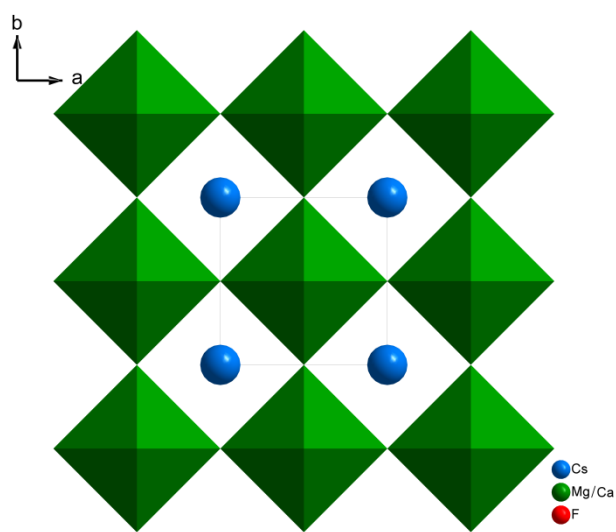

**Figure S1.** Structure of cubic  $\text{CsMF}_3$  ( $M = \text{Mg}$  and  $\text{Ca}$ ).

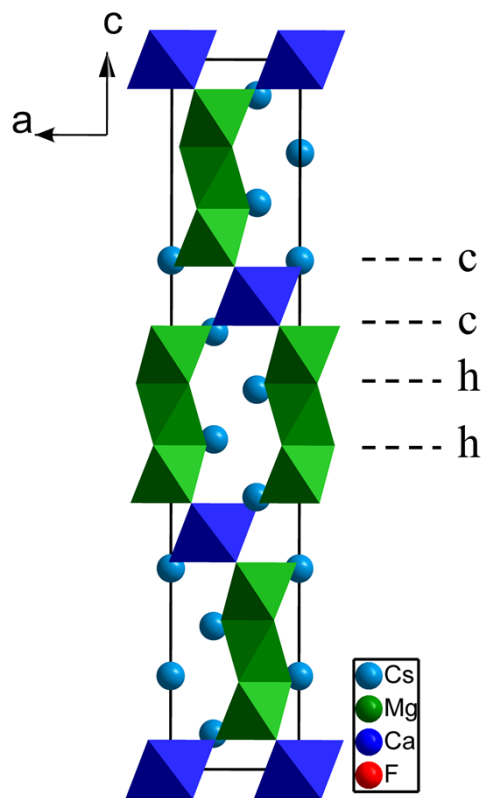

**Figure S2.** Crystal structure of CMCF.

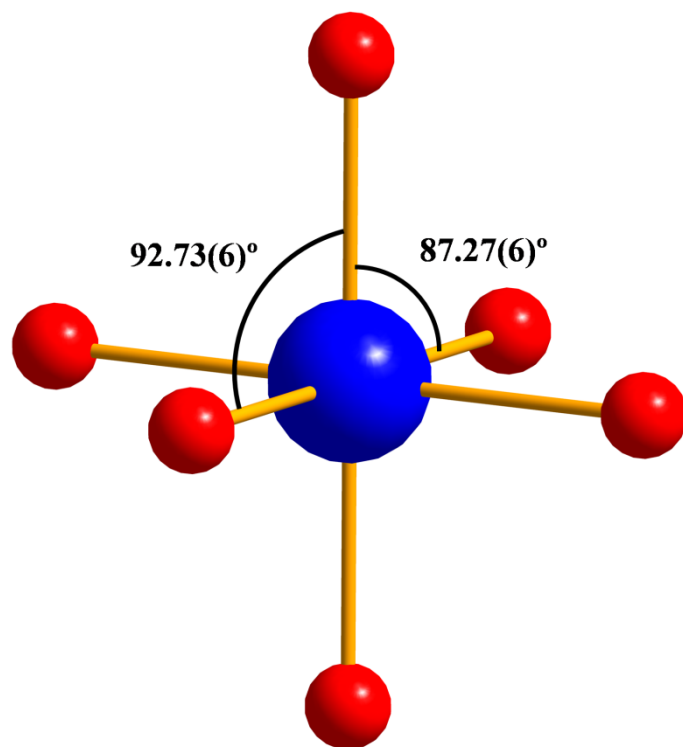

**Figure S3.** The bond angles of [CaF<sub>6</sub>] octahedra.

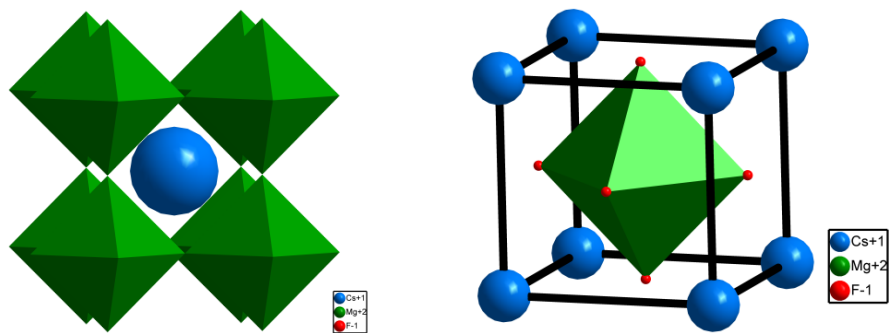

**Figure S4.** The typical perovskite model.

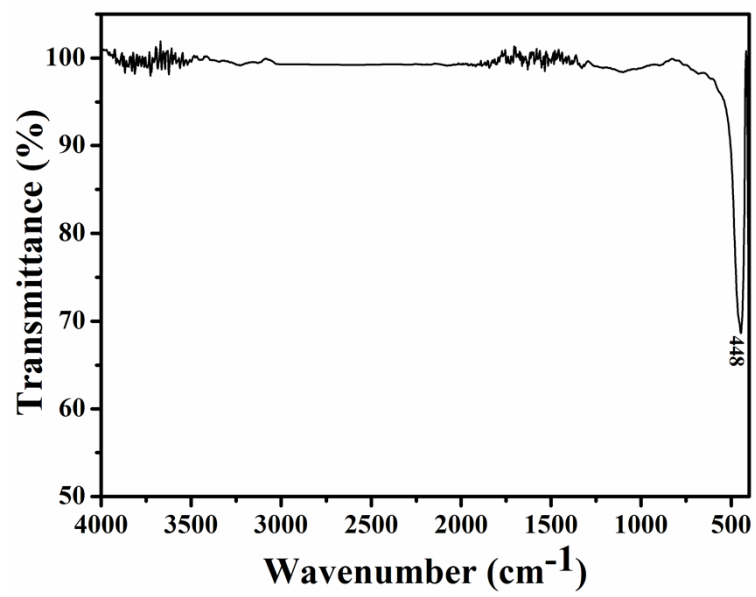

**Figure S5.** Infrared spectrum of CMCF.



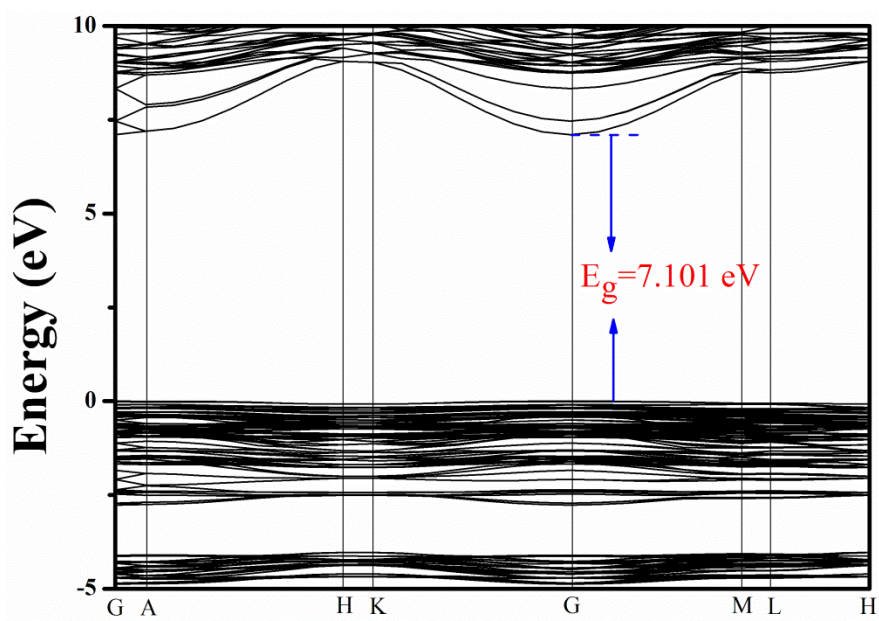

**Figure S6.** Band structure of CMCF.

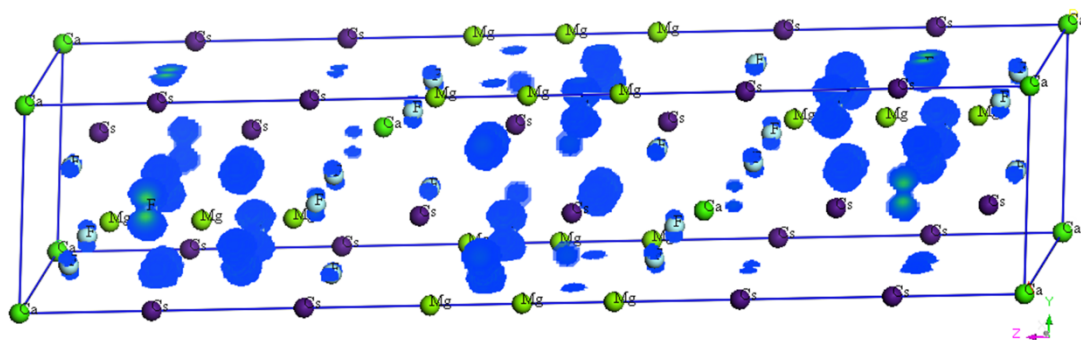

**Figure S7.** The map of charge density of CMCF.
